# Supplementary material for: Assessment of intra and interregional genetic variation in the Eastern Red-backed Salamander, Plethodon cinereus, via analysis of novel microsatellite markers
Source: PLoS One. 2017 Oct 20;12(10):e0186866. doi: 10.1371/journal.pone.0186866 (PMC5650168; doi:10.1371/journal.pone.0186866)
Supplement: S1 File — (XLSX) [file pone.0186866.s009.xlsx]

## Sheet: Msat_Primers
Locus	RepeatUnit	motif1	left_sequence	right_sequence	tagged	Tag	FusionPrimer	LeftTm	RightTm	ExpProdSize
PC1	5	AACAT	AACAAGGATGGGAGGACACC	TTGGACCCAGTAGTGCCTTG	LEFT	TGTAAAACGACGGCCAGT	TGTAAAACGACGGCCAGTAACAAGGATGGGAGGACACC	60.078	60.369	282
PC2	5	AACAT	AGAACCAGGAGCAGGCTATG	TGCTCCTGTTGTTGCACTTG	LEFT	TGTAAAACGACGGCCAGT	TGTAAAACGACGGCCAGTAGAACCAGGAGCAGGCTATG	59.933	60.01	361
PC3	5	AAGAT	TTTGTCTTCTCAGCGCCAAG	AGCTGTTCACTCCATCCTCC	LEFT	TGTAAAACGACGGCCAGT	TGTAAAACGACGGCCAGTTTTGTCTTCTCAGCGCCAAG	59.517	59.861	117
PC4	4	AGAT	TTCACGCTTTCATCCAGTGC	TCGCGAGTAGAAGCCGATTG	LEFT	TGTAAAACGACGGCCAGT	TGTAAAACGACGGCCAGTTTCACGCTTTCATCCAGTGC	59.871	60.986	197
PC5	4	AACG	TTTCCCACACCCTCCATGAC	CCATGGGCTTTGCGGATAAG	LEFT	TGTAAAACGACGGCCAGT	TGTAAAACGACGGCCAGTTTTCCCACACCCTCCATGAC	60.37	60.081	372
PC6	4	AGAT	ATGTAGGTGGAACTGGAGGG	TTGGCCCTCATAGTCGACAC	LEFT	TGTAAAACGACGGCCAGT	TGTAAAACGACGGCCAGTATGTAGGTGGAACTGGAGGG	59.193	60.223	220
PC7	4	AAAT	ACAGCTTTGTAAGTAAACCGGG	AAGAATTGTGTCAGTGGCGG	LEFT	TGTAAAACGACGGCCAGT	TGTAAAACGACGGCCAGTACAGCTTTGTAAGTAAACCGGG	59.619	59.513	184
PC8	4	AAAT	ACTCACCTGCAACCATGTTC	CCGAACACTTCATGAGCAAAC	LEFT	TGTAAAACGACGGCCAGT	TGTAAAACGACGGCCAGTACTCACCTGCAACCATGTTC	59.148	58.817	141
PC9	4	AATG	GAGACAGATGGGTGGATGGG	CACGTGGCCTTTACCTCAAC	LEFT	TGTAAAACGACGGCCAGT	TGTAAAACGACGGCCAGTGAGACAGATGGGTGGATGGG	60.296	59.871	386
PC10	4	AATG	AAGTGCGCACCTGATCTAAC	GATAAAGGGCCGGAGTCTCC	LEFT	TGTAAAACGACGGCCAGT	TGTAAAACGACGGCCAGTAAGTGCGCACCTGATCTAAC	59.02	60.367	281
PC11	4	AAGG	GAAGAAGGCAGGACTGTGTG	TCCCACTCACTCCCTTTATGC	LEFT	TGTAAAACGACGGCCAGT	TGTAAAACGACGGCCAGTGAAGAAGGCAGGACTGTGTG	59.231	60.215	172
PC12	4	AAAT	ACCCAGTAAACAATAAGCGGC	CAGTTGGGTAATGGAACGCC	LEFT	TGTAAAACGACGGCCAGT	TGTAAAACGACGGCCAGTACCCAGTAAACAATAAGCGGC	59.67	59.94	395
PC13	4	AAAT	GATTAAGAATGGGAGCGCGG	GACGTGGCACTTCAACAGAG	LEFT	TGTAAAACGACGGCCAGT	TGTAAAACGACGGCCAGTGATTAAGAATGGGAGCGCGG	59.872	59.874	386
PC14	4	AATC	TACACTCTCTATGCGGACCAC	CTTGTTTGATGCGCTATGGC	LEFT	TGTAAAACGACGGCCAGT	TGTAAAACGACGGCCAGTTACACTCTCTATGCGGACCAC	59.737	58.902	109
PC15	3	AAT	AGATCTCCCTGCTCTGTTCC	TGACGCTTTGACACCTTTGG	LEFT	TGTAAAACGACGGCCAGT	TGTAAAACGACGGCCAGTAGATCTCCCTGCTCTGTTCC	59.276	59.727	143
PC16	3	ACT	GATAGCTCCCTGTAACCCGG	CAGCTCAATTGTCGGTCCAG	LEFT	TGTAAAACGACGGCCAGT	TGTAAAACGACGGCCAGTGATAGCTCCCTGTAACCCGG	60.08	59.661	252
PC17	3	ACT	GTAACACAGGTATGCAGTGC	GCCTCTGTTGCCTGTCCTAG	LEFT	TGTAAAACGACGGCCAGT	TGTAAAACGACGGCCAGTGTAACACAGGTATGCAGTGC	57.554	60.865	366
PC18	3	AAT	ACATGCTAGACACGGAAGGC	TCTAGTTTGTGCCCAGGGAG	LEFT	TGTAAAACGACGGCCAGT	TGTAAAACGACGGCCAGTACATGCTAGACACGGAAGGC	60.863	59.787	430
PC19	3	AGC	TTATCCTCCACCACGTCAGG	AGCTGGCTGAGAAGTAGGTG	LEFT	TGTAAAACGACGGCCAGT	TGTAAAACGACGGCCAGTTTATCCTCCACCACGTCAGG	59.573	59.863	206
PC20	3	AGG	ACCACCGGAAGTCTCAGAAG	CAATCCTGATCCTTGCACCG	LEFT	TGTAAAACGACGGCCAGT	TGTAAAACGACGGCCAGTACCACCGGAAGTCTCAGAAG	59.792	59.728	349
PC21	3	AAT	TGTACACCTCTGCCAGTTCC	ACACCAACCTTCTCCTGACC	LEFT	TGTAAAACGACGGCCAGT	TGTAAAACGACGGCCAGTTGTACACCTCTGCCAGTTCC	60.079	60.006	444
PC22	3	AGG	ACCACCAGAAGATGCGACTC	CAGAACTTCCGATCCTCAGC	LEFT	TGTAAAACGACGGCCAGT	TGTAAAACGACGGCCAGTACCACCAGAAGATGCGACTC	60.508	58.811	412
PC23	5	AACAT	TGTACTCGTCCTATTCGCCC	GTAAAGCGATGGTCAACGGC	RIGHT	TGTAAAACGACGGCCAGT	TGTAAAACGACGGCCAGTGTAAAGCGATGGTCAACGGC	59.725	60.636	309
PC24	5	AACAT	TTGGAAGTATGAGTCGGCCC	ACCTCTTTCCTTCCATGGGC	RIGHT	TGTAAAACGACGGCCAGT	TGTAAAACGACGGCCAGTACCTCTTTCCTTCCATGGGC	60.224	60.444	312
PC25	4	AGAT	CTTGGACAGGCGGGATAGTC	TACAGAGCCCAGACTCCTTG	RIGHT	TGTAAAACGACGGCCAGT	TGTAAAACGACGGCCAGTTACAGAGCCCAGACTCCTTG	60.65	59.206	267
PC26	4	AATG	CTTATGCAAACCTGGGCCTC	TTTGTATATCGCGCTGCAATG	RIGHT	TGTAAAACGACGGCCAGT	TGTAAAACGACGGCCAGTTTTGTATATCGCGCTGCAATG	59.651	58.486	381
PC27	4	AATG	TCACCAGTGTCAGATGGGTG	TGTGTGCTTTGTTGGACTGC	RIGHT	TGTAAAACGACGGCCAGT	TGTAAAACGACGGCCAGTTGTGTGCTTTGTTGGACTGC	60.079	60.293	257
PC28	4	AATC	TGCGCCTTGATTTGCCTATG	AATTTCAAGCACCCATTCCTC	RIGHT	TGTAAAACGACGGCCAGT	TGTAAAACGACGGCCAGTAATTTCAAGCACCCATTCCTC	60.01	57.518	217
PC29	4	AGAT	AGCTCCCACACTGTAACCAC	TTCCACCCGGTTCTTCCTC	RIGHT	TGTAAAACGACGGCCAGT	TGTAAAACGACGGCCAGTTTCCACCCGGTTCTTCCTC	60.368	59.7	253
PC30	4	AATG	TCTGTACCGGGCTTAGTTCG	GAGAGCAACGCAACAGTAGG	RIGHT	TGTAAAACGACGGCCAGT	TGTAAAACGACGGCCAGTGAGAGCAACGCAACAGTAGG	59.939	59.665	385
PC31	4	AAAT	GATGTGGGATGAACTTCGAGG	TTCACGCGGGAACATCAAAC	RIGHT	TGTAAAACGACGGCCAGT	TGTAAAACGACGGCCAGTTTCACGCGGGAACATCAAAC	59.198	60.152	417
PC32	4	AATG	ACCACACCCTGAAGAAGTCC	TTCCATTGAGACCGGAGACC	RIGHT	TGTAAAACGACGGCCAGT	TGTAAAACGACGGCCAGTTTCCATTGAGACCGGAGACC	60.006	59.862	450
PC33	3	AAT	GGCACGATCCATGACCAAAC	TTTAAATACACACGGCCCGC	RIGHT	TGTAAAACGACGGCCAGT	TGTAAAACGACGGCCAGTTTTAAATACACACGGCCCGC	60.293	59.941	447
PC34	3	AAT	AGGAGAATATGACACGGCAATG	GTATGAGATTGATTGGTGTGGG	RIGHT	TGTAAAACGACGGCCAGT	TGTAAAACGACGGCCAGTGTATGAGATTGATTGGTGTGGG	59.292	57.59	346
PC35	3	AAT	CAGCTATGTCTGCCAGGTTG	ACTTAAACCACGCGACACAG	RIGHT	TGTAAAACGACGGCCAGT	TGTAAAACGACGGCCAGTACTTAAACCACGCGACACAG	59.372	59.524	236
PC36	3	AAT	ACCTAGTTTGTGCACGGTTC	TACTCCACCCTCAGTTACGC	RIGHT	TGTAAAACGACGGCCAGT	TGTAAAACGACGGCCAGTTACTCCACCCTCAGTTACGC	59.159	59.578	359
PC37	3	AAG	GAGTGCTGGGACTCTAGAGC	ATGTCCTCCACTCCTGCATG	RIGHT	TGTAAAACGACGGCCAGT	TGTAAAACGACGGCCAGTATGTCCTCCACTCCTGCATG	60.01	60.224	263
PC38	3	AAT	AGCCTAGCCATGTATGAGGG	GAGCCAGATCCTCCACAGAC	RIGHT	TGTAAAACGACGGCCAGT	TGTAAAACGACGGCCAGTGAGCCAGATCCTCCACAGAC	59.418	60.295	185
PC39	3	AAT	AATGGATCATGGCGTTGGTG	ATTAAACCCATCGTGCCTGC	RIGHT	TGTAAAACGACGGCCAGT	TGTAAAACGACGGCCAGTATTAAACCCATCGTGCCTGC	59.651	59.652	412
PC40	3	AAT	GGGAAAGCAGAAGTTCAGGC	ACTTCACAATTGACCGGCAC	RIGHT	TGTAAAACGACGGCCAGT	TGTAAAACGACGGCCAGTACTTCACAATTGACCGGCAC	59.868	59.798	446

## Sheet: BayeScan_Results
Locus_Index	Locus	prob	log10(PO)	qval	alpha	fst	Sig_FDR_0.05
1	Pc5	0.201182	-0.598859	0.439624	-0.11209	0.30207	No
2	Pc7	0.038	-1.4034	0.80679	-9.4639e-05	0.32291	No
3	Pc8	0.04625	-1.3143	0.75512	0.011422	0.32526	No
4	Pc13	0.91957	1.0582	0.080431	1.3439	0.61073	No
5	Pc14	0.11623	-0.88102	0.6586	0.097832	0.34403	No
6	Pc15	0.057411	-1.2153	0.7154	-0.021361	0.31892	No
7	Pc16	0.03144	-1.4886	0.85023	0.0023825	0.3233	No
8	Pc17	0.03739	-1.4107	0.82411	0.0045707	0.3238	No
9	Pc20	0.12863	-0.83086	0.58354	0.081615	0.34019	No
10	Pc28	0.03838	-1.3989	0.78462	0.0042712	0.32376	No
11	Pc37	0.033	-1.4669	0.8384	-0.0013045	0.32259	No
