# Supplementary material for: Assessment of intra and interregional genetic variation in the Eastern Red-backed Salamander, Plethodon cinereus, via analysis of novel microsatellite markers
Source: PLoS One. 2017 Oct 20;12(10):e0186866. doi: 10.1371/journal.pone.0186866 (PMC5650168; doi:10.1371/journal.pone.0186866)
Supplement: S6 File — (XLSX) [file pone.0186866.s014.xlsx]

## Sheet: WLU
Sample_ID	Pop_ID	Pc4		Pc5		Pc7		Pc8		Pc9		Pc10		Pc11		Pc12		Pc13		Pc14		Pc15		Pc16		Pc17		Pc20		Pc21		Pc22		Pc23		Pc25		Pc26		Pc27		Pc28		Pc34		Pc35		Pc36
WLU1	WLU	230	234	377	377	195	195	154	154	398	398	286	286	187	187	0	0	400	400	115	123	168	174	0	0	0	0	361	361	0	0	403	427	323	323	289	301	0	0	275	275	231	239	0	0	0	0	376	376
WLU2	WLU	206	234	0	0	195	195	146	154	402	402	286	298	215	223	407	407	400	400	115	115	174	174	247	268	368	383	361	361	457	460	427	427	248	248	301	301	399	399	267	275	215	239	0	0	0	0	376	376
WLU3	WLU	230	242	385	385	195	195	142	154	402	402	0	0	0	0	407	407	400	408	123	123	174	174	268	268	368	383	361	361	457	460	427	427	248	323	0	0	395	395	263	267	231	239	0	0	0	0	376	376
WLU4	WLU	230	242	0	0	191	195	154	154	0	0	298	298	187	223	407	411	400	400	115	123	168	168	253	268	368	368	361	361	460	460	427	427	243	248	301	301	0	0	263	267	215	243	354	354	236	248	376	376
WLU5	WLU	218	234	377	385	199	199	154	154	0	0	302	302	187	223	407	407	400	400	115	115	165	165	253	280	368	368	358	361	460	460	427	427	243	323	0	0	391	391	0	0	215	231	0	0	0	0	376	376
WLU6	WLU	234	254	377	385	195	195	154	158	398	398	286	298	187	223	407	407	400	408	0	0	168	168	253	268	0	0	358	361	460	460	427	427	258	323	293	301	387	387	263	263	231	239	360	360	0	0	376	376
WLU7	WLU	230	234	377	377	195	195	154	158	0	0	302	302	187	223	407	411	400	404	123	123	168	168	0	0	368	386	358	361	457	457	427	427	258	323	0	0	395	395	0	0	239	239	0	0	0	0	376	376
WLU8	WLU	230	230	377	377	195	199	154	158	410	410	302	302	187	187	407	407	408	408	115	123	168	168	280	280	383	383	361	361	457	460	427	427	243	323	289	301	0	0	267	275	215	239	360	360	242	248	376	376
WLU9	WLU	234	246	385	385	195	195	154	154	402	402	302	302	0	0	0	0	400	408	115	115	168	174	247	274	383	389	358	361	457	457	424	427	248	248	0	0	395	395	275	275	215	239	363	363	242	248	376	376
WLU10	WLU	234	238	373	373	175	195	138	158	402	406	0	0	0	0	0	0	400	400	123	123	168	174	247	268	368	389	358	361	457	457	427	427	323	323	0	0	387	387	0	0	215	239	360	366	248	248	376	376
WLU11	WLU	234	238	385	385	195	195	138	154	410	410	286	286	187	223	407	407	400	400	115	115	168	168	253	268	368	377	361	361	460	460	424	427	258	258	301	301	395	395	0	0	215	239	0	0	0	0	0	0
WLU12	WLU	222	242	377	377	195	195	154	154	402	402	306	306	187	223	407	407	0	0	123	123	168	174	253	253	368	386	361	361	457	457	427	427	248	248	0	0	0	0	0	0	215	239	0	0	0	0	376	376
WLU13	WLU	226	234	385	385	187	195	154	154	0	0	302	302	187	187	407	407	408	408	123	123	168	168	280	280	0	0	361	361	0	0	427	427	298	298	297	297	0	0	267	275	215	239	0	0	0	0	376	376
WLU14	WLU	218	234	385	385	195	195	154	154	410	410	298	298	187	187	407	407	400	400	115	123	165	165	268	280	377	389	358	361	0	0	424	427	258	258	289	289	395	395	267	267	215	231	0	0	0	0	376	376
WLU15	WLU	0	0	0	0	195	199	154	154	0	0	0	0	187	187	407	407	400	400	123	123	159	159	268	280	368	386	361	361	0	0	403	427	243	248	0	0	395	395	267	267	215	239	0	0	0	0	376	376
WLU16	WLU	234	254	385	385	195	199	138	146	398	410	302	302	187	187	407	407	400	400	0	0	168	174	253	280	368	368	358	361	460	460	427	427	318	318	297	297	0	0	267	267	215	239	360	363	242	248	376	376
WLU17	WLU	230	254	0	0	195	199	154	154	410	410	286	286	187	191	407	407	400	400	115	115	0	0	247	280	368	383	361	364	460	460	427	427	258	258	0	0	395	395	263	275	215	215	0	0	0	0	376	376
WLU18	WLU	226	234	377	385	195	195	154	158	0	0	302	302	187	223	407	407	400	400	115	123	168	168	268	280	368	368	361	361	457	460	427	427	243	248	0	0	395	395	267	267	215	231	0	0	0	0	376	376
WLU19	WLU	234	234	0	0	191	199	154	154	402	402	286	302	187	187	407	411	400	400	115	123	0	0	247	268	386	386	361	361	457	457	427	427	248	248	0	0	383	383	267	275	215	215	0	0	0	0	376	376
WLU20	WLU	218	242	385	385	195	195	154	158	0	0	0	0	187	187	0	0	0	0	0	0	0	0	247	268	380	383	361	361	457	460	427	427	323	323	0	0	395	395	263	263	239	239	0	0	0	0	376	376
WLU21	WLU	210	234	0	0	199	199	154	162	418	426	298	298	191	223	407	407	400	408	115	123	168	174	268	280	0	0	361	361	460	460	427	427	248	248	0	0	395	395	275	275	0	0	0	0	0	0	376	376
WLU22	WLU	238	242	377	377	195	195	154	154	418	418	0	0	187	223	0	0	400	400	115	115	165	168	0	0	368	383	361	361	457	460	427	427	248	248	0	0	0	0	263	275	215	239	0	0	0	0	0	0
WLU23	WLU	214	250	377	377	167	195	146	154	406	406	0	0	191	191	407	407	400	408	115	123	0	0	247	280	368	389	358	358	460	460	403	427	248	248	293	293	395	399	275	275	215	215	0	0	0	0	376	376
WLU31	WLU	234	234	385	385	195	199	154	154	0	0	0	0	187	223	407	407	400	400	119	119	168	168	247	268	368	386	358	361	0	0	427	427	243	248	0	0	399	399	275	275	215	215	360	360	242	248	376	376
WLU32	WLU	222	234	385	385	187	187	154	154	406	406	0	0	187	187	407	407	400	400	115	123	0	0	268	268	377	389	361	361	460	460	0	0	258	323	301	301	399	399	267	275	215	239	0	0	0	0	376	376
WLU33	WLU	242	254	377	377	195	199	154	154	410	410	286	286	0	0	407	411	400	404	123	123	168	168	247	247	383	389	361	361	457	460	427	427	248	323	289	309	387	387	275	275	215	243	360	366	242	248	376	376
WLU35	WLU	218	234	377	377	195	199	138	154	402	402	0	0	223	223	407	407	400	404	115	115	168	168	0	0	383	383	358	361	457	460	427	427	0	0	0	0	0	0	267	267	215	239	360	360	242	248	376	376
WLU36	WLU	218	234	377	377	175	195	142	154	0	0	298	298	215	215	407	407	400	400	123	123	0	0	253	280	368	386	361	361	457	460	427	427	323	323	0	0	0	0	275	275	215	231	360	360	0	0	376	376
WLU37	WLU	238	246	0	0	195	199	138	142	0	0	0	0	223	223	407	407	400	400	123	123	168	168	268	280	368	368	0	0	460	460	427	427	248	248	293	293	395	395	267	275	215	215	0	0	242	248	376	376
WLU38	WLU	218	234	0	0	167	195	154	154	0	0	294	310	223	223	407	407	400	408	119	123	174	174	268	268	368	377	361	361	457	460	427	427	248	248	289	301	395	399	287	287	215	243	0	0	0	0	376	376
WLU39	WLU	234	238	385	385	195	199	154	162	0	0	0	0	187	187	0	0	400	400	115	123	159	159	268	280	0	0	361	364	460	460	427	427	243	248	0	0	395	395	275	275	215	243	0	0	0	0	376	376
WLU40	WLU	234	234	377	377	195	195	146	146	410	410	0	0	187	187	0	0	400	408	0	0	0	0	0	0	380	389	361	361	457	457	427	427	243	243	0	0	395	395	267	267	239	239	0	0	0	0	376	376
[truncated: 6 more columns]

## Sheet: OH_PA
Sample_ID	Pop	Pc3		Pc5		Pc7		Pc8		Pc12		Pc13		Pc14		Pc15		Pc16		Pc17		Pc20		Pc25		Pc28		Pc37
SB1	SBI	130	130	217	217	199	199	0	0	0	0	404	404	114	114	176	176	274	274	365	365	364	364	278	278	227	227	261	261
SB2	SBI	130	130	217	217	191	191	142	142	411	411	404	404	114	114	176	182	274	274	365	365	364	364	278	282	227	231	261	261
SB3	SBI	130	130	217	229	191	199	142	142	0	0	404	404	114	114	176	176	274	274	365	365	0	0	282	282	231	231	261	261
SB4	SBI	0	0	217	229	199	199	142	142	411	411	404	404	114	114	167	182	274	274	365	365	364	364	282	286	0	0	261	261
SB5	SBI	130	130	217	229	199	199	142	142	0	0	404	404	114	114	176	176	274	274	365	365	364	364	0	0	227	227	261	261
SB6	SBI	130	130	217	217	199	199	142	142	411	411	404	404	114	114	173	176	274	274	365	365	364	364	0	0	227	231	261	261
SB7	SBI	130	130	217	217	187	199	142	142	0	0	404	404	114	114	170	182	274	274	365	365	361	364	0	0	231	231	261	261
SB8	SBI	130	130	217	217	199	199	142	142	0	0	404	404	114	114	176	176	274	274	365	365	364	364	278	282	227	231	261	261
SB9	SBI	130	130	217	221	191	199	142	142	0	0	404	404	114	114	167	176	274	274	365	365	364	364	278	282	0	0	261	261
SB10	SBI	0	0	217	217	199	199	142	142	411	411	404	404	114	114	176	176	274	274	365	365	364	364	282	286	231	231	261	267
SB11	SBI	130	130	217	217	199	199	142	142	411	411	404	404	114	114	176	176	274	274	365	365	364	364	0	0	227	231	261	261
SB12	SBI	130	130	217	229	199	199	142	158	411	411	404	404	114	114	173	176	274	274	365	365	364	364	0	0	231	235	261	261
SQ1	SQ	130	135	233	257	191	191	158	158	0	0	404	404	114	114	167	167	265	277	365	383	412	412	0	0	227	227	267	273
SQ2	SQ	130	130	241	245	191	199	158	158	0	0	404	404	114	114	167	167	277	277	383	383	412	412	0	0	223	227	261	267
SQ3	SQ	130	130	0	0	191	191	158	158	0	0	404	404	0	0	167	167	277	277	371	371	412	412	290	290	227	227	261	267
SQ4	SQ	130	130	237	241	191	191	158	158	0	0	404	404	114	114	167	167	274	277	383	383	361	412	290	290	215	215	273	273
SQ5	SQ	130	135	229	229	191	199	158	158	0	0	404	404	0	0	0	0	265	277	383	383	361	412	274	278	227	227	267	273
SQ6	SQ	130	135	237	245	191	191	138	158	0	0	404	404	114	114	167	167	268	277	365	371	361	415	282	286	215	227	267	267
SQ7	SQ	135	135	221	265	191	191	158	158	0	0	404	404	114	114	167	167	277	277	383	383	361	412	0	0	215	227	261	273
SQ8	SQ	130	135	229	229	191	191	138	158	0	0	404	404	114	114	167	167	277	277	371	383	361	412	0	0	227	227	267	273
SQ9	SQ	135	135	0	0	191	199	158	158	0	0	404	404	114	114	167	167	265	277	0	0	412	412	0	0	227	227	267	273
SQ10	SQ	130	135	237	249	191	191	138	158	0	0	404	404	114	114	167	167	277	277	365	383	361	412	0	0	227	227	267	267
ANF1	ANF	130	130	233	233	191	199	138	158	0	0	404	404	0	0	158	194	268	277	383	383	364	412	282	286	215	227	273	273
ANF2	ANF	130	135	225	233	191	191	138	138	411	411	404	404	0	0	158	158	268	268	383	383	412	412	282	290	227	227	273	273
ANF3	ANF	130	130	221	249	191	191	158	158	0	0	404	404	114	114	158	182	271	274	383	383	361	412	278	302	227	227	270	273
ANF4	ANF	130	130	229	233	191	191	158	158	0	0	404	404	114	114	188	191	277	277	365	383	412	412	286	294	227	227	273	273
ANF5	ANF	130	135	221	233	191	191	138	138	0	0	404	404	114	114	158	194	289	289	365	383	364	412	0	0	223	227	261	273
ANF6	ANF	130	130	233	233	191	199	138	158	0	0	404	404	114	114	188	194	268	277	383	383	412	412	0	0	227	227	273	273
ANF7	ANF	130	135	0	0	191	191	158	158	411	411	404	404	114	114	188	188	268	277	377	383	364	412	0	0	227	227	0	0
ANF8	ANF	130	135	229	229	191	191	138	158	0	0	404	404	0	0	194	194	268	277	383	383	412	412	0	0	227	227	261	273
ANF9	ANF	130	130	229	233	191	191	158	158	0	0	404	404	0	0	158	182	277	298	383	383	412	412	0	0	227	227	270	273
ANF10	ANF	130	135	233	257	191	199	138	158	0	0	404	404	114	114	0	0	268	277	377	383	364	412	282	298	227	227	270	273
ANF11	ANF	130	135	253	253	191	191	138	158	0	0	404	404	114	114	158	158	0	0	383	383	412	412	282	282	227	227	273	273
DB1	DB	130	135	237	237	191	199	138	138	0	0	404	404	114	114	167	167	265	268	383	383	412	412	290	290	215	227	261	267
DB2	DB	130	135	237	237	191	191	138	158	0	0	404	404	114	114	167	182	265	277	365	365	412	412	278	278	227	227	267	273
DB3	DB	130	135	249	249	191	199	138	158	0	0	404	404	114	114	167	167	265	277	371	383	412	412	282	286	227	227	261	267
DB4	DB	130	130	229	241	191	191	158	158	0	0	404	404	114	114	167	167	277	277	383	383	412	412	0	0	215	227	261	273
DB5	DB	130	130	249	249	191	191	158	158	0	0	404	404	114	114	167	167	268	277	365	383	412	412	0	0	215	227	267	267
DB6	DB	130	130	241	241	191	199	138	158	0	0	404	404	114	114	161	167	265	277	365	383	361	412	0	0	227	231	261	267
DB7	DB	0	0	241	241	191	191	158	158	0	0	404	404	114	114	167	167	277	277	365	383	364	412	0	0	215	227	270	273
DB8	DB	130	130	245	249	191	195	158	158	0	0	404	404	114	114	170	197	265	277	365	371	412	412	282	282	227	227	273	273
DB9	DB	130	130	241	249	191	191	158	158	0	0	404	404	114	114	167	167	265	277	383	383	361	412	282	282	227	227	273	273
DB10	DB	130	135	229	233	191	191	158	158	0	0	404	404	0	0	0	0	0	0	383	383	361	412	274	274	215	215	267	273
DB11	DB	130	130	241	249	191	191	138	158	0	0	404	404	114	114	167	182	265	271	371	383	361	412	286	286	215	215	267	267
DB12	DB	130	130	225	229	191	199	138	158	411	411	404	404	0	0	167	167	277	277	371	383	412	412	0	0	227	227	273	273
MU1	MBSC	135	135	249	261	191	195	150	158	0	0	404	404	114	114	173	173	298	298	365	365	361	361	0	0	215	227	267	273
MU2	MBSC	135	135	225	253	191	191	158	158	0	0	404	404	0	0	161	182	271	271	365	383	361	412	0	0	227	227	267	267
MU3	MBSC	130	135	249	253	191	191	158	158	0	0	404	404	114	114	164	167	277	298	380	380	361	412	0	0	215	215	267	267
MU4	MBSC	130	130	233	249	191	191	138	158	0	0	404	404	114	114	167	167	271	289	365	374	361	361	302	322	227	227	261	267
MU5	MBSC	135	135	245	249	191	191	138	158	0	0	404	404	0	0	173	179	277	277	365	374	361	361	306	306	215	227	267	267
MU6	MBSC	130	135	253	265	191	191	138	138	0	0	404	404	114	114	0	0	277	298	365	374	361	361	282	290	227	227	267	273
MU7	MBSC	135	135	241	253	191	195	138	158	0	0	404	404	114	114	167	167	271	298	383	383	361	361	310	314	215	215	267	273
MU8	MBSC	135	135	241	249	191	195	158	158	0	0	404	404	0	0	161	167	271	271	371	374	412	412	310	310	215	215	267	267
MU9	MBSC	130	130	261	261	191	191	138	158	0	0	404	404	0	0	167	167	271	298	365	374	361	361	0	0	227	227	270	273
MU10	MBSC	130	130	237	237	191	195	158	158	0	0	404	404	114	114	167	191	298	298	365	380	361	361	0	0	215	215	261	261
MU11	MBSC	135	135	241	241	191	191	138	166	0	0	404	404	114	114	167	173	277	277	365	380	361	361	0	0	227	227	261	267
MU12	MBSC	135	135	237	237	191	191	138	158	0	0	404	404	114	114	173	188	271	298	365	365	361	361	0	0	215	227	267	267
MS13	MBSC	130	135	241	241	191	191	158	158	0	0	404	404	114	114	167	194	271	304	365	383	361	412	0	0	219	231	267	267
MS14	MBSC	135	135	0	0	191	195	158	158	0	0	404	404	114	114	0	0	271	289	365	371	361	361	258	306	215	227	267	267
MS15	MBSC	130	135	241	241	191	191	138	138	0	0	404	404	114	114	167	194	277	301	365	383	361	361	282	334	215	227	267	273
MS16	MBSC	135	135	229	245	191	195	138	158	0	0	404	404	114	114	167	188	274	277	380	383	361	361	306	326	227	239	267	267
MS17	MBSC	135	135	233	241	191	199	138	166	0	0	404	404	114	114	188	188	277	277	365	383	361	361	262	306	215	215	267	267
MS18	MBSC	135	135	253	261	191	199	158	166	0	0	404	404	0	0	167	167	277	277	365	383	361	361	262	298	227	227	267	273
MS19	MBSC	130	135	237	253	191	195	138	158	0	0	404	404	0	0	167	194	298	298	365	383	361	361	0	0	227	227	267	273
MS20	MBSC	135	135	253	253	191	191	138	158	0	0	404	404	114	114	167	194	277	298	383	383	0	0	0	0	215	215	267	270
MS21	MBSC	130	135	241	261	191	191	158	158	0	0	404	404	114	114	167	167	274	298	365	371	361	361	0	0	215	227	267	267
MS22	MBSC	130	135	245	253	191	199	138	158	0	0	404	404	114	114	197	197	277	301	365	383	361	412	0	0	215	215	267	267
MS23	MBSC	135	135	233	233	191	195	158	158	0	0	404	404	114	114	167	167	271	298	371	380	361	412	0	0	215	227	267	267
MS24	MBSC	130	135	253	261	191	191	138	158	0	0	404	404	114	114	167	167	265	289	374	383	361	412	0	0	215	227	267	267

## Sheet: Analysis
Sample_ID	Pop	Pc3		Pc5		Pc7		Pc8		Pc12		Pc13		Pc14		Pc15		Pc16		Pc17		Pc20		Pc25		Pc28		Pc37
SB1	SBI	130	130	217	217	199	199	0	0	0	0	404	404	114	114	176	176	274	274	365	365	364	364	278	278	227	227	261	261
SB2	SBI	130	130	217	217	191	191	142	142	411	411	404	404	114	114	176	182	274	274	365	365	364	364	278	282	227	231	261	261
SB3	SBI	130	130	217	229	191	199	142	142	0	0	404	404	114	114	176	176	274	274	365	365	0	0	282	282	231	231	261	261
SB4	SBI	0	0	217	229	199	199	142	142	411	411	404	404	114	114	167	182	274	274	365	365	364	364	282	286	0	0	261	261
SB5	SBI	130	130	217	229	199	199	142	142	0	0	404	404	114	114	176	176	274	274	365	365	364	364	0	0	227	227	261	261
SB6	SBI	130	130	217	217	199	199	142	142	411	411	404	404	114	114	173	176	274	274	365	365	364	364	0	0	227	231	261	261
SB7	SBI	130	130	217	217	187	199	142	142	0	0	404	404	114	114	170	182	274	274	365	365	361	364	0	0	231	231	261	261
SB8	SBI	130	130	217	217	199	199	142	142	0	0	404	404	114	114	176	176	274	274	365	365	364	364	278	282	227	231	261	261
SB9	SBI	130	130	217	221	191	199	142	142	0	0	404	404	114	114	167	176	274	274	365	365	364	364	278	282	0	0	261	261
SB10	SBI	0	0	217	217	199	199	142	142	411	411	404	404	114	114	176	176	274	274	365	365	364	364	282	286	231	231	261	267
SB11	SBI	130	130	217	217	199	199	142	142	411	411	404	404	114	114	176	176	274	274	365	365	364	364	0	0	227	231	261	261
SB12	SBI	130	130	217	229	199	199	142	158	411	411	404	404	114	114	173	176	274	274	365	365	364	364	0	0	231	235	261	261
SQ1	SQ	130	135	233	257	191	191	158	158	0	0	404	404	114	114	167	167	265	277	365	383	412	412	0	0	227	227	267	273
SQ2	SQ	130	130	241	245	191	199	158	158	0	0	404	404	114	114	167	167	277	277	383	383	412	412	0	0	223	227	261	267
SQ3	SQ	130	130	0	0	191	191	158	158	0	0	404	404	0	0	167	167	277	277	371	371	412	412	290	290	227	227	261	267
SQ4	SQ	130	130	237	241	191	191	158	158	0	0	404	404	114	114	167	167	274	277	383	383	361	412	290	290	215	215	273	273
SQ5	SQ	130	135	229	229	191	199	158	158	0	0	404	404	0	0	0	0	265	277	383	383	361	412	274	278	227	227	267	273
SQ6	SQ	130	135	237	245	191	191	138	158	0	0	404	404	114	114	167	167	268	277	365	371	361	415	282	286	215	227	267	267
SQ7	SQ	135	135	221	265	191	191	158	158	0	0	404	404	114	114	167	167	277	277	383	383	361	412	0	0	215	227	261	273
SQ8	SQ	130	135	229	229	191	191	138	158	0	0	404	404	114	114	167	167	277	277	371	383	361	412	0	0	227	227	267	273
SQ9	SQ	135	135	0	0	191	199	158	158	0	0	404	404	114	114	167	167	265	277	0	0	412	412	0	0	227	227	267	273
SQ10	SQ	130	135	237	249	191	191	138	158	0	0	404	404	114	114	167	167	277	277	365	383	361	412	0	0	227	227	267	267
ANF1	ANF	130	130	233	233	191	199	138	158	0	0	404	404	0	0	158	194	268	277	383	383	364	412	282	286	215	227	273	273
ANF2	ANF	130	135	225	233	191	191	138	138	411	411	404	404	0	0	158	158	268	268	383	383	412	412	282	290	227	227	273	273
ANF3	ANF	130	130	221	249	191	191	158	158	0	0	404	404	114	114	158	182	271	274	383	383	361	412	278	302	227	227	270	273
ANF4	ANF	130	130	229	233	191	191	158	158	0	0	404	404	114	114	188	191	277	277	365	383	412	412	286	294	227	227	273	273
ANF5	ANF	130	135	221	233	191	191	138	138	0	0	404	404	114	114	158	194	289	289	365	383	364	412	0	0	223	227	261	273
ANF6	ANF	130	130	233	233	191	199	138	158	0	0	404	404	114	114	188	194	268	277	383	383	412	412	0	0	227	227	273	273
ANF7	ANF	130	135	0	0	191	191	158	158	411	411	404	404	114	114	188	188	268	277	377	383	364	412	0	0	227	227	0	0
ANF8	ANF	130	135	229	229	191	191	138	158	0	0	404	404	0	0	194	194	268	277	383	383	412	412	0	0	227	227	261	273
ANF9	ANF	130	130	229	233	191	191	158	158	0	0	404	404	0	0	158	182	277	298	383	383	412	412	0	0	227	227	270	273
ANF10	ANF	130	135	233	257	191	199	138	158	0	0	404	404	114	114	0	0	268	277	377	383	364	412	282	298	227	227	270	273
ANF11	ANF	130	135	253	253	191	191	138	158	0	0	404	404	114	114	158	158	0	0	383	383	412	412	282	282	227	227	273	273
DB1	DB	130	135	237	237	191	199	138	138	0	0	404	404	114	114	167	167	265	268	383	383	412	412	290	290	215	227	261	267
DB2	DB	130	135	237	237	191	191	138	158	0	0	404	404	114	114	167	182	265	277	365	365	412	412	278	278	227	227	267	273
DB3	DB	130	135	249	249	191	199	138	158	0	0	404	404	114	114	167	167	265	277	371	383	412	412	282	286	227	227	261	267
DB4	DB	130	130	229	241	191	191	158	158	0	0	404	404	114	114	167	167	277	277	383	383	412	412	0	0	215	227	261	273
DB5	DB	130	130	249	249	191	191	158	158	0	0	404	404	114	114	167	167	268	277	365	383	412	412	0	0	215	227	267	267
DB6	DB	130	130	241	241	191	199	138	158	0	0	404	404	114	114	161	167	265	277	365	383	361	412	0	0	227	231	261	267
DB7	DB	0	0	241	241	191	191	158	158	0	0	404	404	114	114	167	167	277	277	365	383	364	412	0	0	215	227	270	273
DB8	DB	130	130	245	249	191	195	158	158	0	0	404	404	114	114	170	197	265	277	365	371	412	412	282	282	227	227	273	273
DB9	DB	130	130	241	249	191	191	158	158	0	0	404	404	114	114	167	167	265	277	383	383	361	412	282	282	227	227	273	273
DB10	DB	130	135	229	233	191	191	158	158	0	0	404	404	0	0	0	0	0	0	383	383	361	412	274	274	215	215	267	273
DB11	DB	130	130	241	249	191	191	138	158	0	0	404	404	114	114	167	182	265	271	371	383	361	412	286	286	215	215	267	267
DB12	DB	130	130	225	229	191	199	138	158	411	411	404	404	0	0	167	167	277	277	371	383	412	412	0	0	227	227	273	273
MU1	MBSC	135	135	249	261	191	195	150	158	0	0	404	404	114	114	173	173	298	298	365	365	361	361	0	0	215	227	267	273
MU2	MBSC	135	135	225	253	191	191	158	158	0	0	404	404	0	0	161	182	271	271	365	383	361	412	0	0	227	227	267	267
MU3	MBSC	130	135	249	253	191	191	158	158	0	0	404	404	114	114	164	167	277	298	380	380	361	412	0	0	215	215	267	267
MU4	MBSC	130	130	233	249	191	191	138	158	0	0	404	404	114	114	167	167	271	289	365	374	361	361	302	322	227	227	261	267
MU5	MBSC	135	135	245	249	191	191	138	158	0	0	404	404	0	0	173	179	277	277	365	374	361	361	306	306	215	227	267	267
MU6	MBSC	130	135	253	265	191	191	138	138	0	0	404	404	114	114	0	0	277	298	365	374	361	361	282	290	227	227	267	273
MU7	MBSC	135	135	241	253	191	195	138	158	0	0	404	404	114	114	167	167	271	298	383	383	361	361	310	314	215	215	267	273
MU8	MBSC	135	135	241	249	191	195	158	158	0	0	404	404	0	0	161	167	271	271	371	374	412	412	310	310	215	215	267	267
MU9	MBSC	130	130	261	261	191	191	138	158	0	0	404	404	0	0	167	167	271	298	365	374	361	361	0	0	227	227	270	273
MU10	MBSC	130	130	237	237	191	195	158	158	0	0	404	404	114	114	167	191	298	298	365	380	361	361	0	0	215	215	261	261
MU11	MBSC	135	135	241	241	191	191	138	166	0	0	404	404	114	114	167	173	277	277	365	380	361	361	0	0	227	227	261	267
MU12	MBSC	135	135	237	237	191	191	138	158	0	0	404	404	114	114	173	188	271	298	365	365	361	361	0	0	215	227	267	267
MS13	MBSC	130	135	241	241	191	191	158	158	0	0	404	404	114	114	167	194	271	304	365	383	361	412	0	0	219	231	267	267
MS14	MBSC	135	135	0	0	191	195	158	158	0	0	404	404	114	114	0	0	271	289	365	371	361	361	258	306	215	227	267	267
MS15	MBSC	130	135	241	241	191	191	138	138	0	0	404	404	114	114	167	194	277	301	365	383	361	361	282	334	215	227	267	273
MS16	MBSC	135	135	229	245	191	195	138	158	0	0	404	404	114	114	167	188	274	277	380	383	361	361	306	326	227	239	267	267
MS17	MBSC	135	135	233	241	191	199	138	166	0	0	404	404	114	114	188	188	277	277	365	383	361	361	262	306	215	215	267	267
MS18	MBSC	135	135	253	261	191	199	158	166	0	0	404	404	0	0	167	167	277	277	365	383	361	361	262	298	227	227	267	273
MS19	MBSC	130	135	237	253	191	195	138	158	0	0	404	404	0	0	167	194	298	298	365	383	361	361	0	0	227	227	267	273
MS20	MBSC	135	135	253	253	191	191	138	158	0	0	404	404	114	114	167	194	277	298	383	383	0	0	0	0	215	215	267	270
MS21	MBSC	130	135	241	261	191	191	158	158	0	0	404	404	114	114	167	167	274	298	365	371	361	361	0	0	215	227	267	267
MS22	MBSC	130	135	245	253	191	199	138	158	0	0	404	404	114	114	197	197	277	301	365	383	361	412	0	0	215	215	267	267
MS23	MBSC	135	135	233	233	191	195	158	158	0	0	404	404	114	114	167	167	271	298	371	380	361	412	0	0	215	227	267	267
MS24	MBSC	130	135	253	261	191	191	138	158	0	0	404	404	114	114	167	167	265	289	374	383	361	412	0	0	215	227	267	267
WLU1	WLU	0	0	377	377	195	195	0	0	407	407	400	400	114	122	167	173	0	0	383	389	361	361	290	302	231	239	255	258
WLU2	WLU	0	0	0	0	195	195	146	154	407	407	400	400	114	114	173	173	247	268	0	0	361	361	302	302	215	239	252	267
WLU3	WLU	0	0	385	385	195	195	142	154	407	407	400	408	122	122	173	173	268	268	368	383	361	361	0	0	231	239	255	273
WLU4	WLU	0	0	0	0	191	195	154	154	407	411	400	400	114	122	167	167	253	268	368	383	361	361	302	302	215	243	255	282
WLU5	WLU	0	0	377	385	199	199	154	154	407	407	400	400	114	114	164	164	253	280	368	368	358	361	294	302	215	231	255	276
WLU6	WLU	0	0	377	385	195	195	154	158	407	407	400	408	0	0	167	167	253	268	368	368	358	361	0	0	231	239	255	282
WLU7	WLU	0	0	377	377	195	195	154	158	407	411	400	404	122	122	167	167	0	0	0	0	358	361	0	0	239	239	255	276
WLU8	WLU	0	0	377	377	195	199	154	158	407	407	408	408	114	122	167	167	280	280	368	386	361	361	290	302	215	239	255	282
WLU9	WLU	0	0	385	385	195	195	154	154	0	0	400	408	114	114	167	173	247	274	0	0	358	361	0	0	215	239	255	273
WLU10	WLU	0	0	373	373	175	195	138	158	0	0	400	400	122	122	167	173	247	268	383	389	358	361	0	0	215	239	276	282
WLU11	WLU	0	0	385	385	195	195	138	154	407	407	400	400	114	114	167	167	253	268	368	389	361	361	302	302	215	239	255	255
WLU12	WLU	0	0	377	377	195	195	154	154	407	407	0	0	122	122	167	173	253	253	368	377	361	361	0	0	215	239	273	282
WLU13	WLU	0	0	385	385	187	195	154	154	407	407	408	408	122	122	167	167	280	280	368	386	361	361	298	298	215	239	255	255
WLU14	WLU	0	0	385	385	195	195	154	154	407	407	400	400	114	122	164	164	268	280	0	0	358	361	290	290	215	231	264	282
WLU15	WLU	0	0	0	0	195	199	154	154	407	407	400	400	122	122	158	158	268	280	377	389	361	361	0	0	215	239	261	273
WLU16	WLU	0	0	385	385	195	199	138	146	0	0	400	400	114	114	167	173	253	280	368	386	358	361	298	298	215	239	255	276
WLU17	WLU	0	0	0	0	195	199	154	154	407	407	400	400	114	114	0	0	247	280	368	368	361	364	0	0	215	215	264	282
WLU18	WLU	0	0	377	385	195	195	154	158	407	407	400	400	114	122	167	167	268	280	368	383	361	361	0	0	215	231	276	282
WLU19	WLU	0	0	0	0	191	199	154	154	407	411	400	400	114	122	0	0	247	268	368	368	361	361	0	0	215	215	255	264
WLU20	WLU	0	0	385	385	195	195	154	158	0	0	0	0	0	0	0	0	247	268	386	386	361	361	0	0	239	239	255	282
WLU21	WLU	0	0	0	0	199	199	154	162	407	407	400	408	114	122	167	173	268	280	380	383	361	361	0	0	0	0	255	255
WLU22	WLU	0	0	377	377	195	195	154	154	0	0	400	400	114	114	164	167	0	0	0	0	361	361	0	0	215	239	255	282
WLU23	WLU	0	0	377	377	167	195	146	154	407	407	400	408	114	122	0	0	247	280	368	383	358	358	294	294	215	215	255	276
WLU31	WLU	0	0	385	385	195	199	154	154	407	407	400	400	118	118	167	167	247	268	368	389	358	361	0	0	215	215	255	255
WLU32	WLU	0	0	385	385	187	187	154	154	407	407	400	400	114	122	0	0	268	268	368	386	361	361	302	302	215	239	255	261
WLU33	WLU	0	0	377	377	195	199	154	154	407	411	400	404	122	122	167	167	247	247	377	389	361	361	290	310	215	243	255	282
WLU35	WLU	0	0	377	377	195	199	138	154	407	407	400	404	114	114	167	167	0	0	383	383	358	361	0	0	215	239	255	282
WLU36	WLU	0	0	377	377	175	195	142	154	407	407	400	400	122	122	0	0	253	280	368	386	361	361	0	0	215	231	261	282
WLU37	WLU	0	0	0	0	195	199	138	142	407	407	400	400	122	122	167	167	268	280	368	368	0	0	294	294	215	215	255	255
WLU38	WLU	0	0	0	0	167	195	154	154	407	407	400	408	118	122	173	173	268	268	368	377	361	361	290	302	215	243	255	261
WLU39	WLU	0	0	385	385	195	199	154	162	0	0	400	400	114	122	158	158	268	280	0	0	361	364	0	0	215	243	255	282
WLU40	WLU	0	0	377	377	195	195	146	146	0	0	400	408	0	0	0	0	0	0	380	389	361	361	0	0	239	239	255	255
